# Supplementary material
Source: MDPI journal article supplement (https://www.mdpi.com/2311-7524/9/11/1245)
Supplement: s1 [file s1 › horticulturae-2684443-supplementary.pdf]

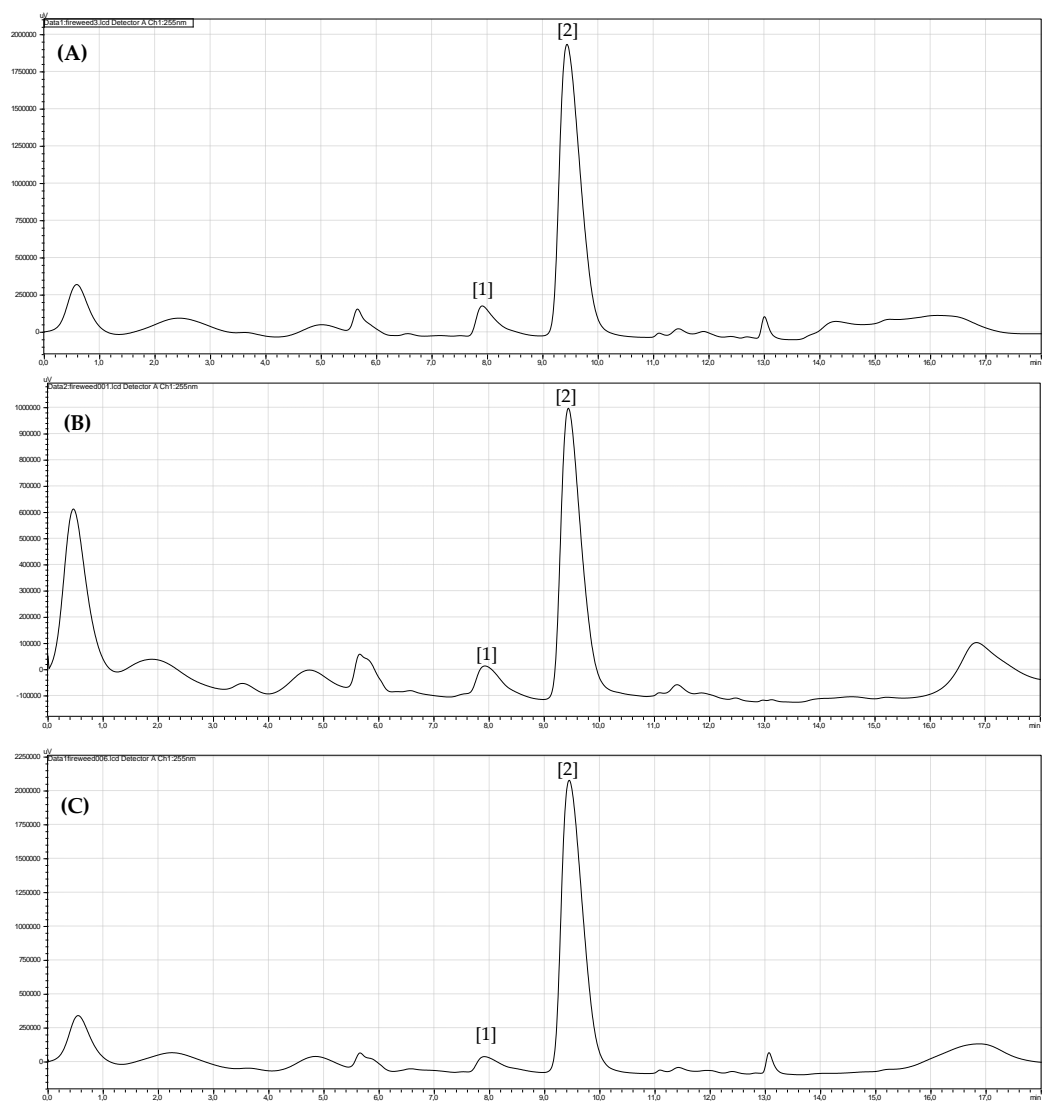

Figure S1. Chromatograms from identification of vitamin C in fireweed: (A) organic, (B) natural, (C) bioynamic leaves: [1] dehydroascorbic acid, [2] l-ascorbic acid

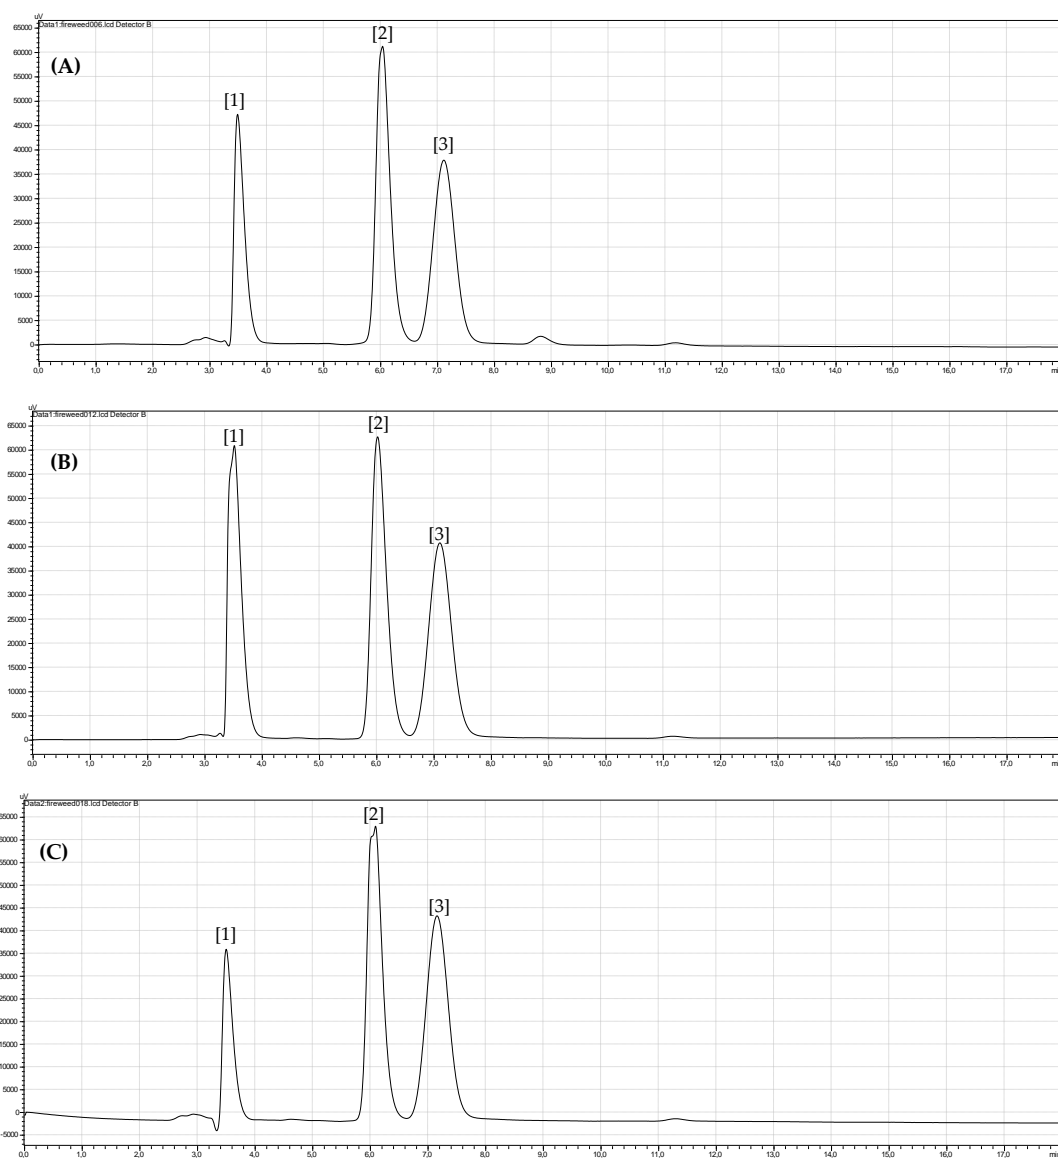

Figure S2. Chromatograms from identification of sugars in fireweed: (A) organic, (B) natural, (C) biodynamic leaves: [1] fructose, [2] glucose, [3] sucrose
